# Supplementary material
Source: PubMed Central journal article supplement (PMC5702268)
Supplement: NIHMS920265-supplement-Figure_S2.pdf [file NIHMS920265-supplement-Figure_S2.pdf]

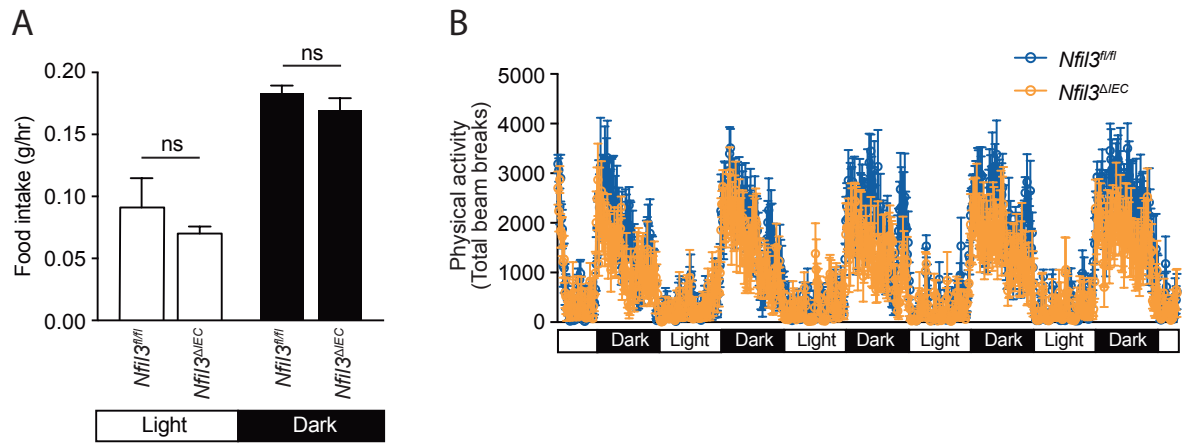

**Figure S2: Food consumption and physical activity are similar in *Nfil3<sup>fl/fl</sup>* and *Nfil3<sup>ΔIEC</sup>* mice.**

**(A)** Rate of food intake in *Nfil3<sup>ΔIEC</sup>* and *Nfil3<sup>fl/fl</sup>* mice during day and night. N=6 mice per group. **(B)** Recording of total physical activity of *Nfil3<sup>ΔIEC</sup>* and *Nfil3<sup>fl/fl</sup>* mice over 5 days. N=6 mice per group. All mice were fed on chow diet. Error bars represent SEM; statistics were performed with Student's t-test. ns, not significant.
