# Supplementary material
Source: PubMed Central journal article supplement (PMC5702268)
Supplement: NIHMS920265-supplement-Figure_S3.pdf [file NIHMS920265-supplement-Figure_S3.pdf]

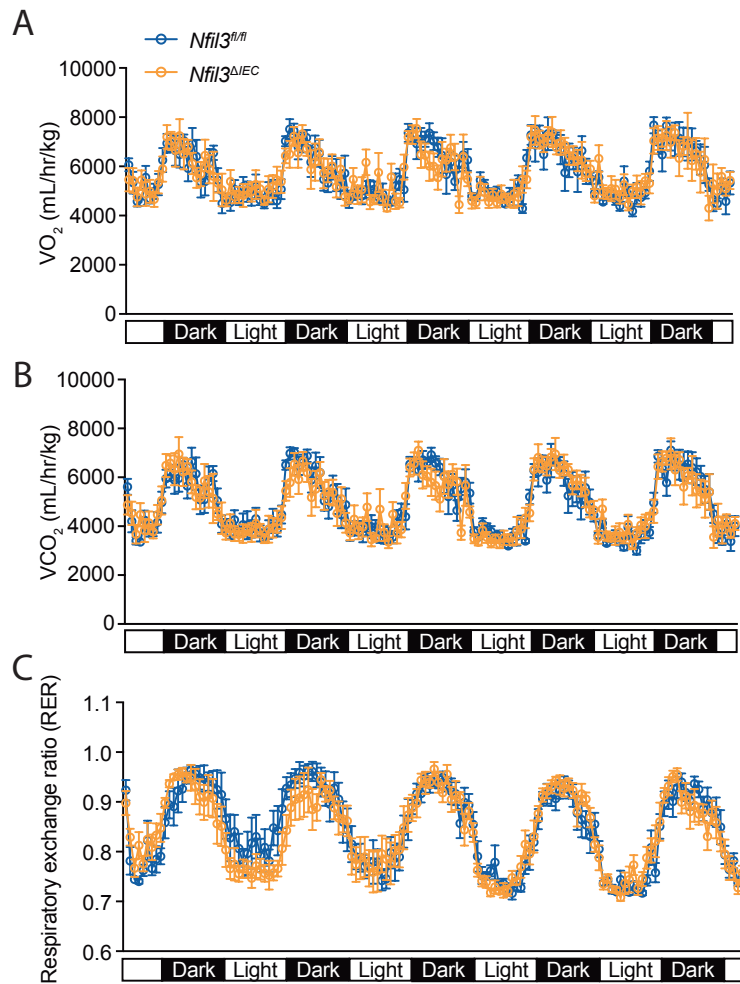

**Figure S3: Energy utilization is similar in  $Nfil3^{fl/fl}$  and  $Nfil3^{\Delta IEC}$  mice.** (A) Oxygen consumption rate of  $Nfil3^{\Delta IEC}$  and  $Nfil3^{fl/fl}$  mice recorded over 5 days. N=6 mice per group. (B)  $CO_2$  production rate of  $Nfil3^{\Delta IEC}$  and  $Nfil3^{fl/fl}$  mice recorded over 5 days. N=6 mice per group. (C) Respiratory exchange ratio of  $Nfil3^{\Delta IEC}$  and  $Nfil3^{fl/fl}$  mice recorded over 5 days. N=6 mice per group. All mice were fed on chow diet. Error bars represent SEM; statistics were performed with Student's t-test.
