# Supplementary material
Source: PubMed Central journal article supplement (PMC5702268)
Supplement: NIHMS920265-supplement-Figure_S5.pdf [file NIHMS920265-supplement-Figure_S5.pdf]

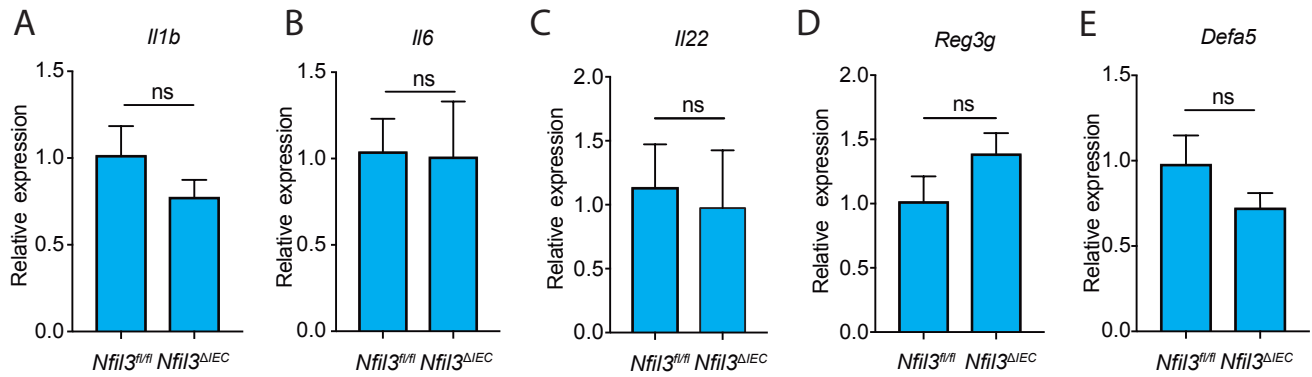

**Figure S5: Expression levels of key pro-inflammatory cytokines and antimicrobial proteins are similar in *Nfil3<sup>ΔIEC</sup>* and *Nfil3<sup>fl/fl</sup>* mice. (A-E) qRT-PCR analysis of *Il1b* (A), *Il6* (B), *Il22* (C), *Reg3g* (D) and *Defa5* (E) in distal ileum from *Nfil3<sup>fl/fl</sup>* and *Nfil3<sup>ΔIEC</sup>* mice. n=3 per each group. Error bars represent SEM; statistics were performed with Student's t-test. ns, not significant.**
