# Supplementary material
Source: PubMed Central journal article supplement (PMC5702268)
Supplement: NIHMS920265-supplement-Figure_S8.pdf [file NIHMS920265-supplement-Figure_S8.pdf]

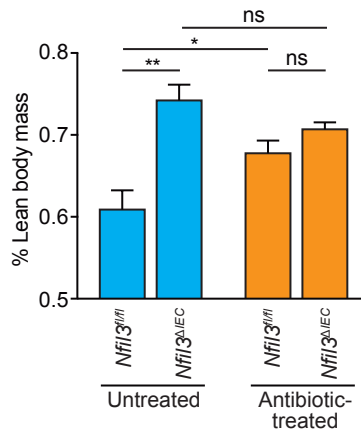

**Figure S8: Lean body mass percentage of antibiotic-treated *Nfil3<sup>MIEC</sup>* and *Nfil3<sup>fl/fl</sup>* mice.** Mice were treated with antibiotics or left untreated after switching to HFD for 10 weeks. Lean body mass was determined by EchoMRI. N=4-6 mice per group. Error bars represent SEM; statistics were performed with one-way ANOVA. \*p<0.05; \*\*p<0.01; ns, not significant.
