# Supplementary material
Source: PubMed Central journal article supplement (PMC5702268)
Supplement: NIHMS920265-supplement-Figure_S9.pdf [file NIHMS920265-supplement-Figure_S9.pdf]

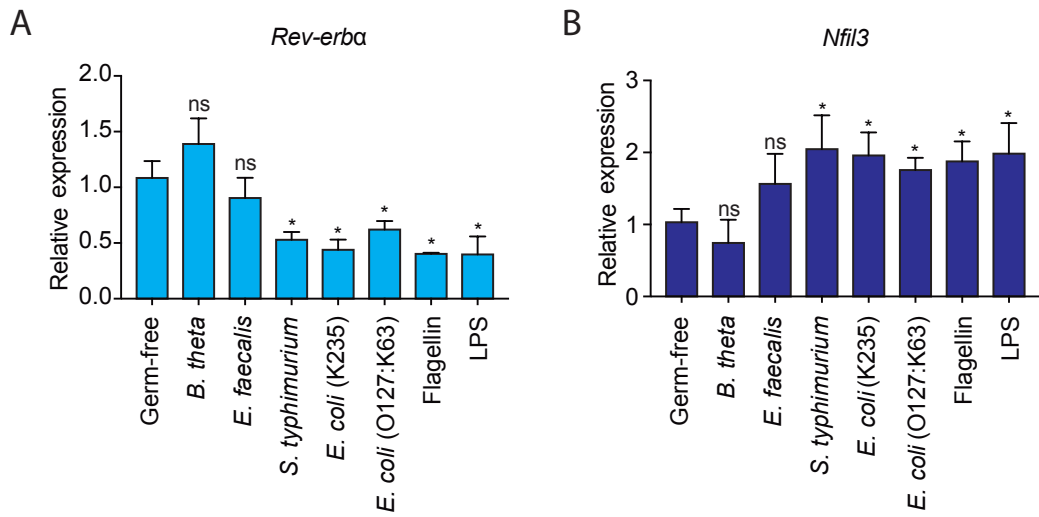

**Figure S9: Epithelial *Nfil3* expression can be induced by flagellin or lipopolysaccharide (LPS).** (A,B) qRT-PCR quantification of epithelial *Rev-erba* (A) and *Nfil3* (B) transcripts in germ-free mice, germ-free mice mono-colonized with *Bacteroides thetaiotaomicron* (*B. theta*), *Enterococcus faecalis*, *Salmonella typhimurium*, non-pathogenic *Escherichia coli* strain K235 or pathogenic *Escherichia coli* strain O127:K63, and germ-free mice treated with flagellin or LPS. Mice were sacrificed at ZT4. N=3-6 per group. Error bars represent SEM; statistics were performed with Student's t-test. \* $p < 0.05$ ; ns, not significant.
