# Supplementary material
Source: PubMed Central journal article supplement (PMC5702268)
Supplement: NIHMS920265-supplement-Figure_S11.pdf [file NIHMS920265-supplement-Figure_S11.pdf]

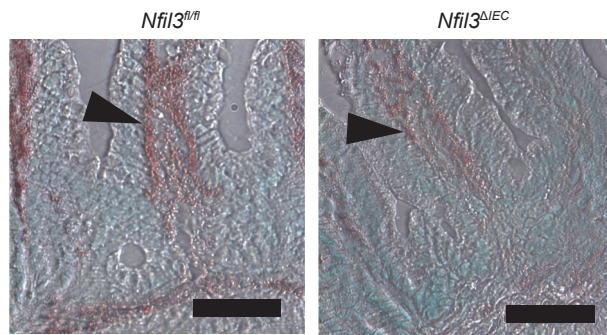

**Figure S11: *Nfil3<sup>MEC</sup>* mice have reduced lipid accumulation in subepithelial tissues.** Oil Red O staining of small intestine from mice fed on HFD. There is reduced lipid accumulation in subepithelial tissues (black arrowhead), suggesting reduced export to lymphatic capillaries, which transport packaged lipids to the bloodstream. Nuclei were stained with methyl green. Scale bar=40  $\mu$ m.
